# Supplementary material for: NMR-Based Characterization of Citrus Tacle Juice and Low-Level NMR and UV—Vis Data Fusion for Monitoring Its Fractions from Membrane-Based Operations
Source: MDPI journal article supplement (doi:10.3390/antiox12010002), 2022-12-20
Supplement: s1 [file s1]

# **NMR-Based Characterization of Citrus Tacle Juice and Low-Level NMR and UV – Vis Data Fusion for Monitoring Its Fractions from Membrane-Based Operations**

**Martina Gaglianò <sup>1,2</sup>, Giuseppina De Luca <sup>1,\*</sup>, Carmela Conidi <sup>2</sup> and Alfredo Cassano <sup>2,\*</sup>**

<sup>1</sup> Department of Chemistry & Chemical Technologies, University of Calabria, Via P. Bucci, 87036 Rende, Italy

<sup>2</sup> Institute on Membrane Technology, ITM-CNR, 87036 Rende, Italy

\* Correspondence: giuseppina.deluca@unical.it (G.D.L.); a.cassano@itm.cnr.it (A.C.);  
Tel.: +39-0984-493323 (G.D.L.); Tel.: +39-0984-492067 (A.C.)

**Table S1:** Metabolites identified in the 500 MHz  $^1\text{H}$  Spectrum of the aqueous phase of Tacle juice at pH 3.41.

| Compound                      | Assignment           | <sup>1</sup> H (ppm) | Multiplicity | <sup>13</sup> C (ppm) |  |
|-------------------------------|----------------------|----------------------|--------------|-----------------------|--|
| Amino acids                   |                      |                      |              |                       |  |
| Valine                        | γ-CH <sub>3</sub>    | 0.98                 | d            |                       |  |
|                               | γ'-CH <sub>3</sub>   | 1.04                 | d            |                       |  |
| Isoleucine                    | γ-CH <sub>3</sub>    | 0.99                 |              |                       |  |
|                               | δ-CH <sub>3</sub>    | 0.95                 |              |                       |  |
| Leucine                       | γ-CH <sub>3</sub>    | 1.70                 |              |                       |  |
|                               | δ-CH <sub>3</sub>    | 0.95                 |              |                       |  |
| Alanine                       | α-CH                 | 3.79                 | d            |                       |  |
|                               | β-CH <sub>3</sub>    | 1.47                 |              |                       |  |
| Threonine                     | α-CH                 | 3.96                 | d            |                       |  |
|                               | γ-CH <sub>3</sub>    | 1.22                 |              |                       |  |
| Arginine                      | β-CH <sub>2</sub>    | 1.65;1.72            | m            |                       |  |
|                               | γ-CH <sub>2</sub>    | 1.90                 | m            |                       |  |
|                               | δ-CH <sub>2</sub>    | 3.23                 |              |                       |  |
| GABA<br>(γ-aminobutyric acid) | α-CH <sub>2</sub>    | 2.46                 | t            |                       |  |
|                               | β-CH <sub>2</sub>    | 1.90                 | m            |                       |  |
|                               | γ-CH <sub>2</sub>    | 3.03                 | t            |                       |  |
| Glutamine                     | α-CH                 | 3.79                 | m            |                       |  |
|                               | β-CH <sub>2</sub>    | 2.13                 |              |                       |  |
|                               | γ-CH <sub>2</sub>    | 2.53                 |              |                       |  |
| Proline                       | α-CH                 | 4.13                 | m            |                       |  |
|                               | β-CH                 | 2.33                 |              |                       |  |
|                               | β'-CH                | 2.06                 |              |                       |  |
|                               | γ-CH <sub>2</sub>    | 1.99                 |              |                       |  |
|                               | δ-CH                 | 3.40                 |              |                       |  |
|                               | δ'-CH                | 3.33                 |              |                       |  |
| DMP<br>(dimethylproline)      | α-CH                 | 4.07                 | m            |                       |  |
|                               | β-CH                 | 2.48                 |              |                       |  |
|                               | β'-CH                | 2.27                 |              |                       |  |
|                               | γ-CH <sub>2</sub>    | 2.16                 |              |                       |  |
|                               | δ-CH                 | 3.53                 | s            |                       |  |
|                               | δ'-CH                | 3.69                 |              |                       |  |
|                               | N-CH <sub>3</sub>    | 3.09                 |              |                       |  |
|                               | N-CH <sub>3</sub> '  | 3.28                 |              |                       |  |
| Tyrosine                      | C2,6H ring           | 7.31                 | d            |                       |  |
|                               | C3,5H ring           | 6.91                 | d            |                       |  |
| Carbohydrates                 |                      |                      |              |                       |  |
| α-glucose                     | CH-1                 | 5.22                 | d            | 94.83<br>73.80        |  |
|                               | CH-2                 | 3.53                 |              |                       |  |
|                               | CH-3                 | 3.70                 |              |                       |  |
|                               | CH-4                 | 3.46                 |              |                       |  |
|                               | CH-5                 | 3.83                 |              |                       |  |
|                               | CH <sub>2</sub> -6,6 | 3.77;3.83            |              |                       |  |

|                 |                           |            |    |       |
|-----------------|---------------------------|------------|----|-------|
| β-glucose       | CH-1                      | 4.64       | dd | 98.65 |
|                 | CH-2                      | 3.23       |    | 76.93 |
|                 | CH-3                      | 3.48       |    | 78.54 |
|                 | CH-4                      | 3.38       |    | 72.38 |
|                 | CH-5                      | 3.46       |    | 78.62 |
|                 | CH <sub>2</sub> -6,6      | 3.73; 3.81 |    | 63.52 |
| Sucrose         | CH-1 (Glc)                | 5.40       | d  | 94.83 |
|                 | CH-2                      | 3.57       |    | 73.80 |
|                 | CH-3                      | 3.75       |    | 75.55 |
|                 | CH-4                      | 3.47       |    | 71.95 |
|                 | CH-5                      | 3.85       |    | 75.07 |
|                 | CH <sub>2</sub> -6,6      | 3.80;3.82  |    | 62.88 |
|                 | CH <sub>2</sub> -1' (Fru) | 3.67       |    | 64.10 |
|                 | CH-2'                     |            |    | 104.2 |
|                 | CH-3'                     | 4.20       |    | 79.18 |
|                 | CH-4'                     | 4.04       |    | 76.93 |
|                 | CH-5'                     | 3.85       |    | 84.05 |
|                 | CH <sub>2</sub> -6',6'    | 3.83       |    | 65.73 |
| α-fructose      | CH <sub>2</sub> -1,1      | 3.58       |    | 65.70 |
|                 | CH-3                      | 4.09       |    | 78.18 |
|                 | CH-4                      | 4.09       |    | 78.18 |
|                 | CH-5                      | 3.82       |    | 83.36 |
|                 | CH <sub>2</sub> -6,6      | 3,68; 3.77 |    | 65.48 |
| β-fructose      | CH-3                      | 3.78       |    | 70.34 |
|                 | CH-4                      | 3.88       |    | 72.45 |
|                 | CH-5                      | 3.99       |    | 77.20 |
|                 | CH <sub>2</sub> -6,6      | 3.69; 4.01 |    | 66.67 |
| Organic Acids   |                           |            |    |       |
| Lactic acid     | α-CH                      | 3.71       | d  |       |
|                 | β-CH <sub>3</sub>         | 1.22       |    |       |
| Succinic acid   | α,β-CH <sub>2</sub>       | 2.64       | s  |       |
| Malic acid      | α-CH                      | 4.46       |    |       |
|                 | β-CH <sub>2</sub>         | 2.72       |    |       |
|                 | β'-CH <sub>2</sub>        | 2.86       |    |       |
| Citric acid     | αγ-CH                     | 2.78       | d  | 46.6  |
|                 | α'γ'-CH                   | 2.91       | d  | 46.6  |
| Aspartic acid   | α-CH                      | 4.00       | dd |       |
|                 | β-CH <sub>2</sub>         | 2.71       |    |       |
|                 | β'-CH <sub>2</sub>        | 2.84       |    |       |
| Formic acid     | HCOOH                     | 8.32       | s  |       |
| Other compounds |                           |            |    |       |
| Ethanol         | CH <sub>3</sub>           | 1.17       | t  |       |
|                 | CH                        | 3.67       |    |       |
| Methanol        | CH <sub>3</sub>           | 3.32       | s  |       |
| Phlorin         | C4H ring                  | 6.15       | t  |       |
|                 | C2,6H ring                | 6.22       | d  |       |

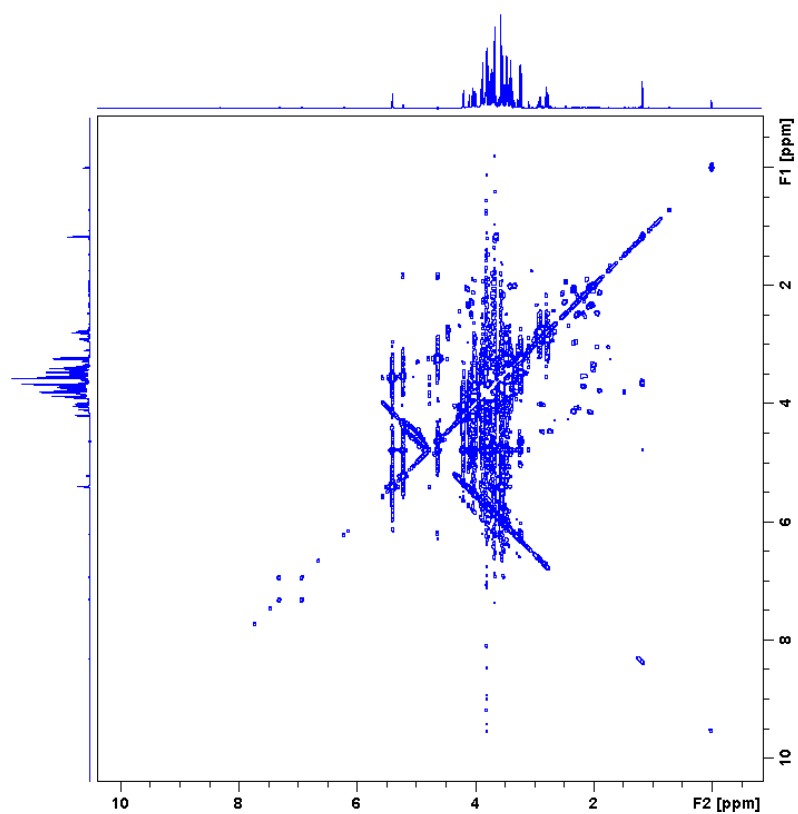

**Figure S1:** 2D  $^1\text{H}$  COSY spectrum (Bruker pulse sequence: *cosygpprqf*) recorded on Tacle juice in  $\text{D}_2\text{O}$  (field strength of 11.74 T).

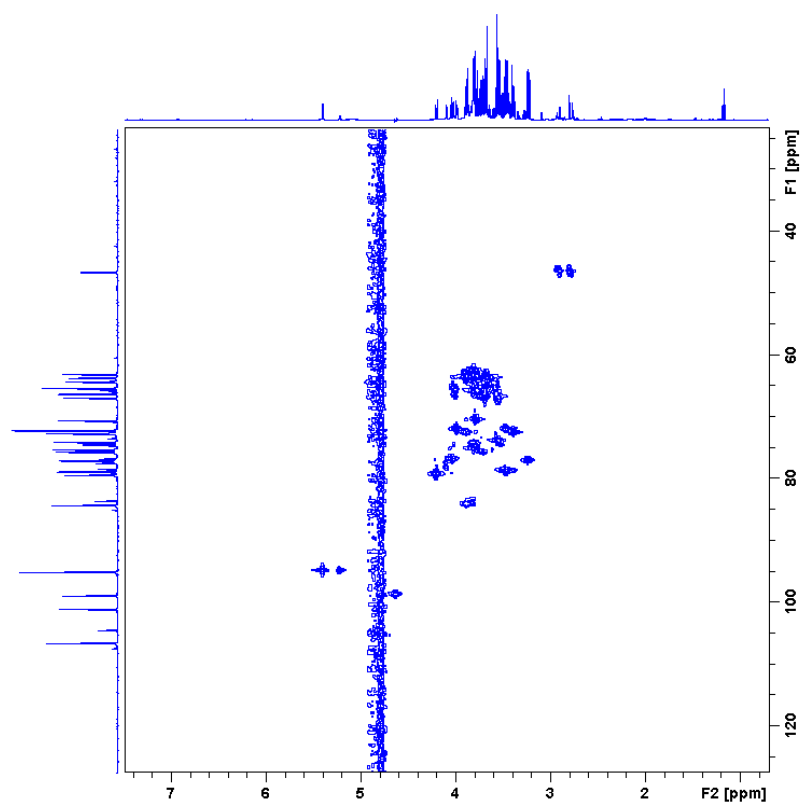

**Figure S2:** 2D  $^1\text{H}$ - $^{13}\text{C}$  HMQC spectrum (Bruker pulse sequence: *hmqcgpqf*) recorded on Tacle juice in  $\text{D}_2\text{O}$  (field strength of 11.74 T).
